# Supplementary material for: Vasculogenic hydrogel enhances islet survival, engraftment, and function in leading extrahepatic sites
Source: PubMed Central journal article supplement — Sci Adv. 2017 Jun 2;3(6):e1700184. doi: 10.1126/sciadv.1700184 (PMC5457148; doi:10.1126/sciadv.1700184), 2017-06-02
Supplement: 1700184_SM.pdf [file 1700184_SM.pdf]

## Supplementary Materials for

### **Vasculogenic hydrogel enhances islet survival, engraftment, and function in leading extrahepatic sites**

Jessica D. Weaver, Devon M. Headen, Jahizreal Aquart, Christopher T. Johnson, Lonnie D. Shea, Haval Shirwan, Andrés J. García

Published 2 June 2017, *Sci. Adv.* **3**, e1700184 (2017)  
DOI: 10.1126/sciadv.1700184

#### **This PDF file includes:**

- fig. S1. Gross morphology of extrahepatic transplant sites during gel casting.
- fig. S2. Correlation between site vascularization fractional area and site leukocyte density.
- fig. S3. Blood glucose traces demonstrating individual recipient graft performance in extrahepatic islet transplant sites.
- fig. S4. Long-term engraftment of marginal islet mass in EFP with PEG-VEGF.
- fig. S5. Comparison of reversal in intraportal control islet transplant site and EFP/PEG-VEGF transplant site syngeneic diabetes reversal.
- fig. S6. Survival curve for SUBQ groups.
- fig. S7. Density of vascularized islets by site as demonstrated by lectin labeling.
- fig. S8. Dose-dependent response of Luc<sup>+</sup>GFP<sup>+</sup> islet signal in B6 recipients in EFP site over a 3-week period.
- fig. S9. In vivo imaging of intraportally infused islets.
- fig. S10. Bioluminescence signal kinetics by time point.
- table S1. Exact *P* values for select comparisons between groups in vascularization metrics analyses.
- table S2. Exact *P* values for select comparisons between groups in leukocyte presence analyses.

## Supplementary Materials

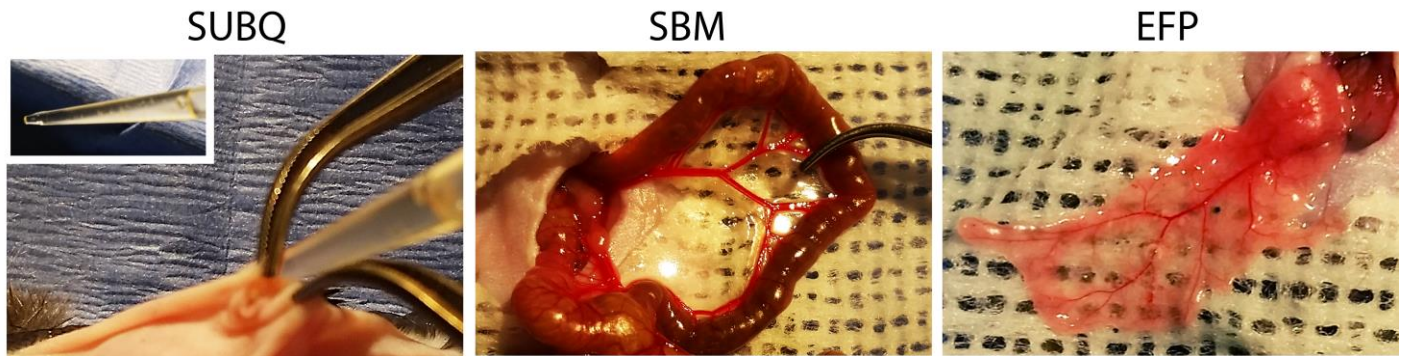

fig. S1. Gross morphology of extrahepatic transplant sites during gel casting.

table S1. Exact *P* values for select comparisons between groups in vascularization metrics analyses.

| Fractional Area     |               | Pancreas | Week 2       | Week 4       |
|---------------------|---------------|----------|--------------|--------------|
|                     |               |          | EFP/PEG-VEGF | EFP/PEG-VEGF |
| Week 2              | SUBQ/PEG      | 0.0143   |              |              |
|                     | SUBQ/PEG-VEGF | 0.0415   | 0.0264       |              |
|                     | SBM/PEG       | 0.0375   |              |              |
| Week 4              | SUBQ/PEG      | 0.0016   |              |              |
|                     | SUBQ/PEG-VEGF | 0.0074   |              | 0.0035       |
| Total Branch Length |               |          |              |              |
| Week 2              | SUBQ/PEG      | 0.0010   |              |              |
|                     | SUBQ/PEG-VEGF | 0.0491   |              |              |
| Week 4              | SUBQ/PEG      | 0.0054   |              |              |
|                     | SUBQ/PEG-VEGF | 0.0211   |              | 0.0031       |
| Junctions           |               |          |              |              |
| Week 4              | SUBQ/PEG-VEGF |          |              | 0.0170       |
| Branches            |               |          |              |              |
| Week 2              | SUBQ/PEG-VEGF |          |              | 0.0135       |
| Week 4              | SUBQ/PEG-VEGF |          |              | 0.0100       |

table S2. Exact *P* values for select comparisons between groups in leukocyte presence analyses.

| CD45          | SUBQ/PEG | SUBQ/PEG-VEGF |
|---------------|----------|---------------|
| SUBQ/PEG-VEGF | > 0.9999 |               |
| SBM/PEG       | 0.0944   |               |
| SBM/PEG-VEGF  | 0.0229   |               |
| EFP/PEG       | 0.0089   |               |
| EFP/PEG-VEGF  | 0.0007   | 0.0103        |

**CD11b**

|               |          |        |
|---------------|----------|--------|
| SUBQ/PEG-VEGF | > 0.9999 |        |
| SBM/PEG       | 0.5708   |        |
| SBM/PEG-VEGF  | 0.0405   |        |
| EFP/PEG       | 0.0096   |        |
| EFP/PEG-VEGF  | 0.0114   | 0.0170 |

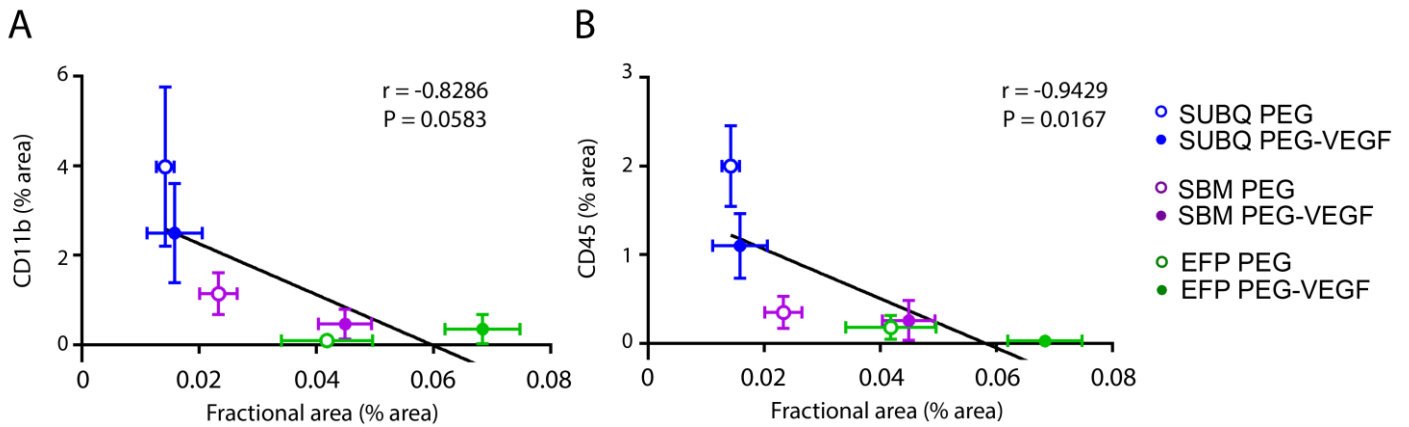

fig. S2. Correlation between site vascularization fractional area and site leukocyte density.

Error bars = SEM. Linear non-parametric two-tailed Spearman correlation.

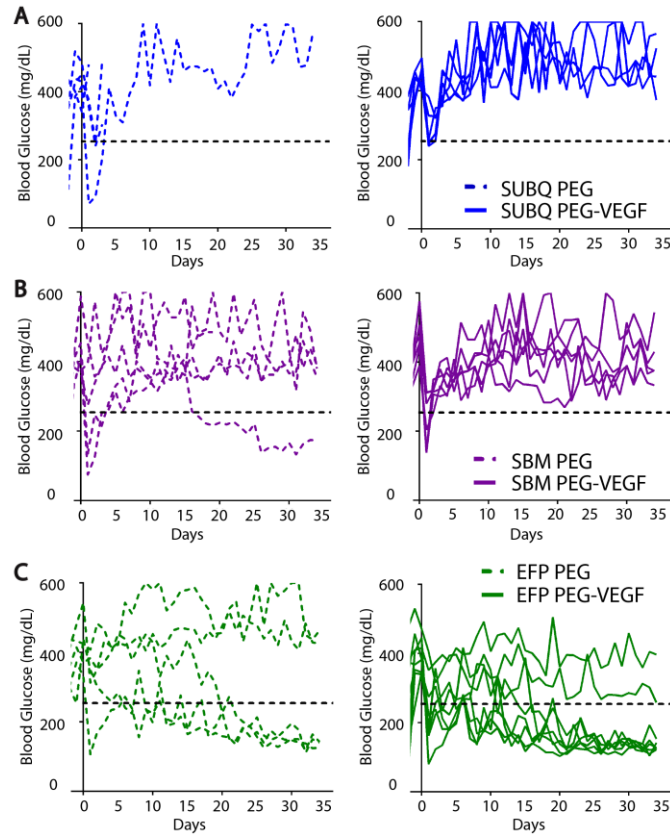

**fig. S3. Blood glucose traces demonstrating individual recipient graft performance in extrahepatic islet transplant sites.**

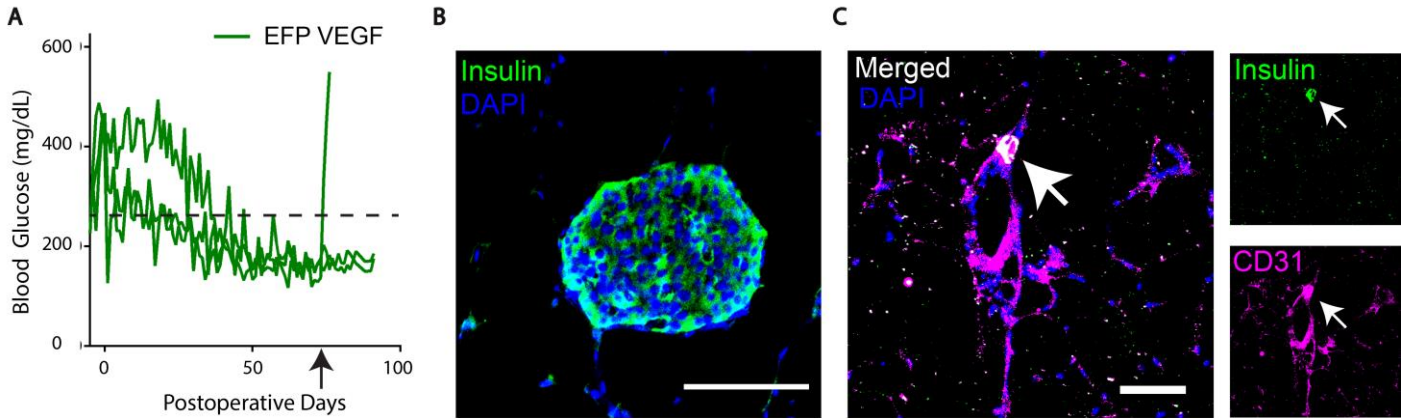

**fig. S4. Long-term engraftment of marginal islet mass in EFP with PEG-VEGF.** (A) A separate EFP/PEG-VEGF marginal islet mass transplant evaluating long-term function out to 100 days confirmed the stability of islet engraftment (N = 3). The black arrow indicates graft removal in one recipient at day 73 post-transplantation, showing return to hyperglycemia. (B) Insulin staining confirmed robust islet engraftment, with a peripheral section of an islet (C) demonstrating proximal CD31-positive blood vessels. White arrows in (C) highlight part of an islet near a CD31-positive vessel. Scale bars = 100  $\mu$ m.

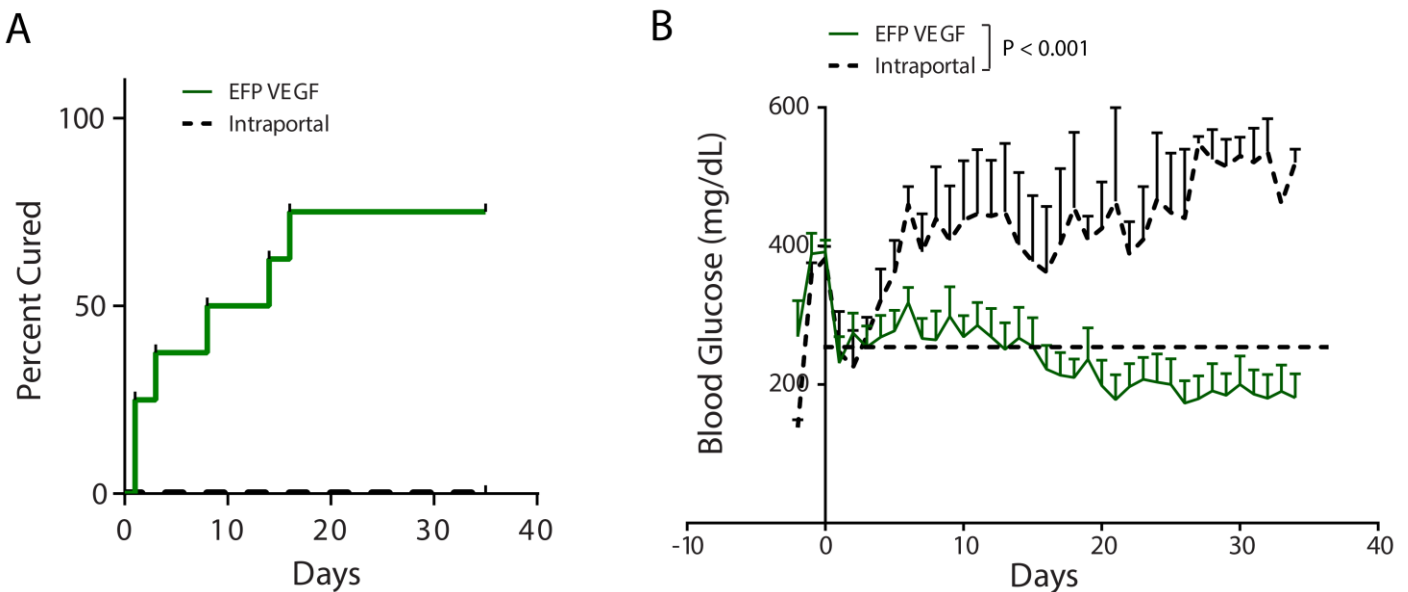

**fig. S5. Comparison of reversal in intraportal control islet transplant site and EFP/PEG-VEGF transplant site syngeneic diabetes reversal.** (A) Survival curves and (B) average non-fasting blood glucose measurements (N = 3 intraperitoneal, N = 8 EFP/PEG-VEGF). Two-tailed unpaired t-test. Error bars = SEM.

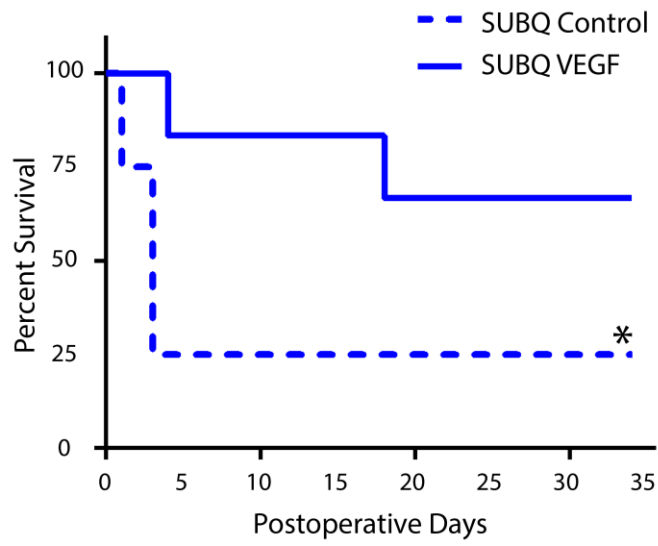

**fig. S6. Survival curve for SUBQ groups.** \*  $P < 0.05$  by Log-rank (Mantel-Cox) test.

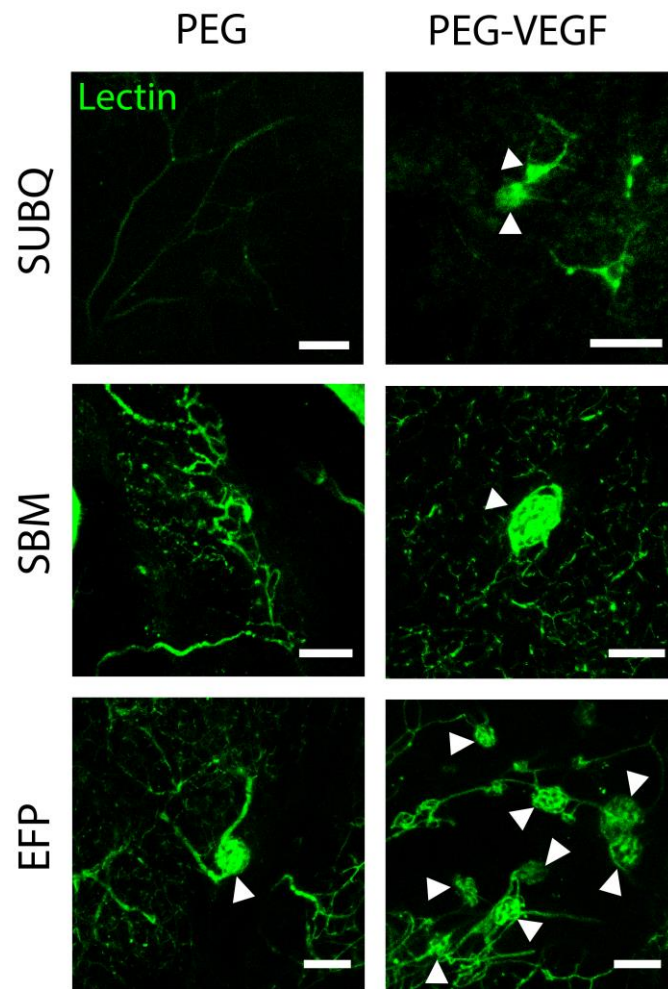

**fig. S7. Density of vascularized islets by site as demonstrated by lectin labeling.** Images showing transplant-site dependent differences in the density of engrafted and perfused islets (white arrowhead) within extrahepatic transplant sites. Scale bars = 200  $\mu$ m.

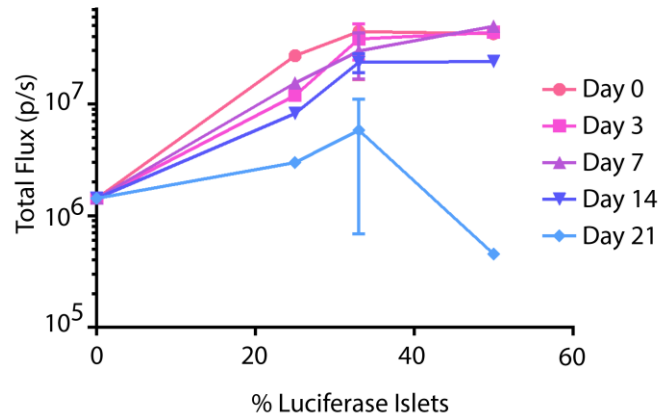

**fig. S8. Dose-dependent response of Luc<sup>+</sup>GFP<sup>+</sup> islet signal in B6 recipients in EFP site over a 3-week period.**

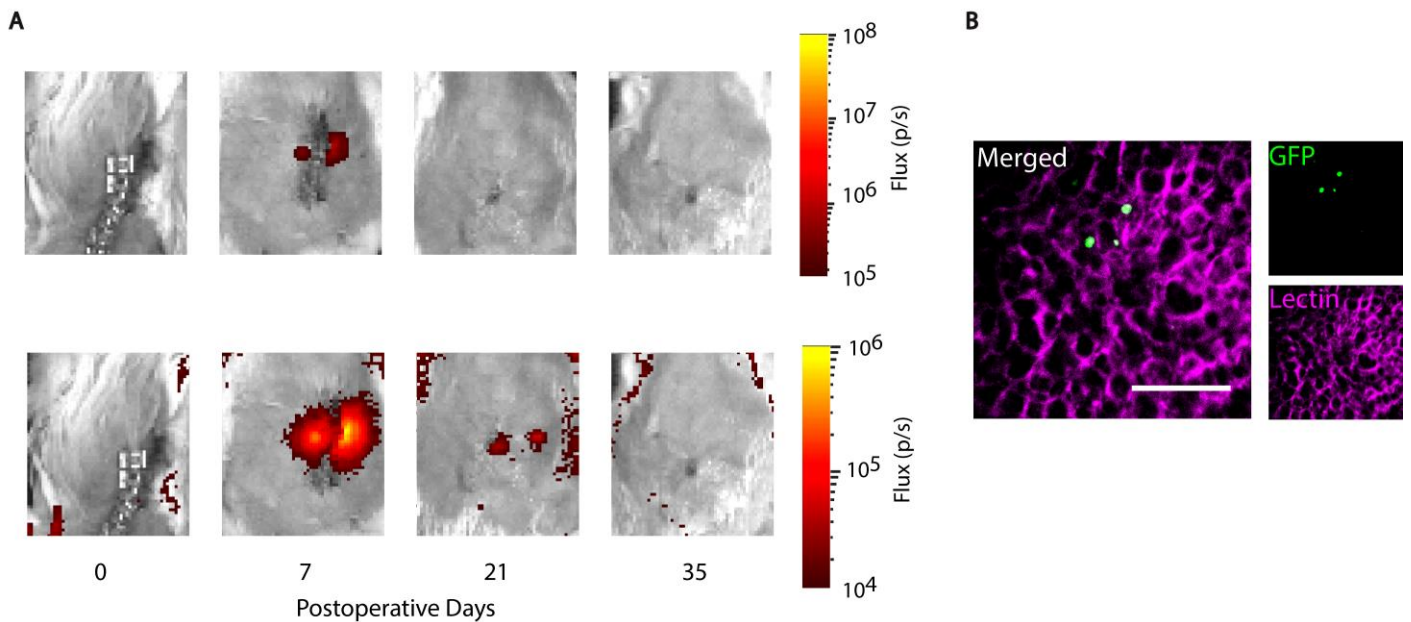

**fig. S9. In vivo imaging of intraportally infused islets. (A)** Bioluminescent imaging of intraportally transplanted islets demonstrated significantly lower luciferase activity of transplanted islets, with near-baseline signal for the majority of the 35 day period. Upper panel: same scale as Figure 5B; lower panel: magnified scale. **(B)** Mice were perfused with lectin to visualize surviving GFP-islets within the intrahepatic vasculature. Scale bar = 100  $\mu$ m.



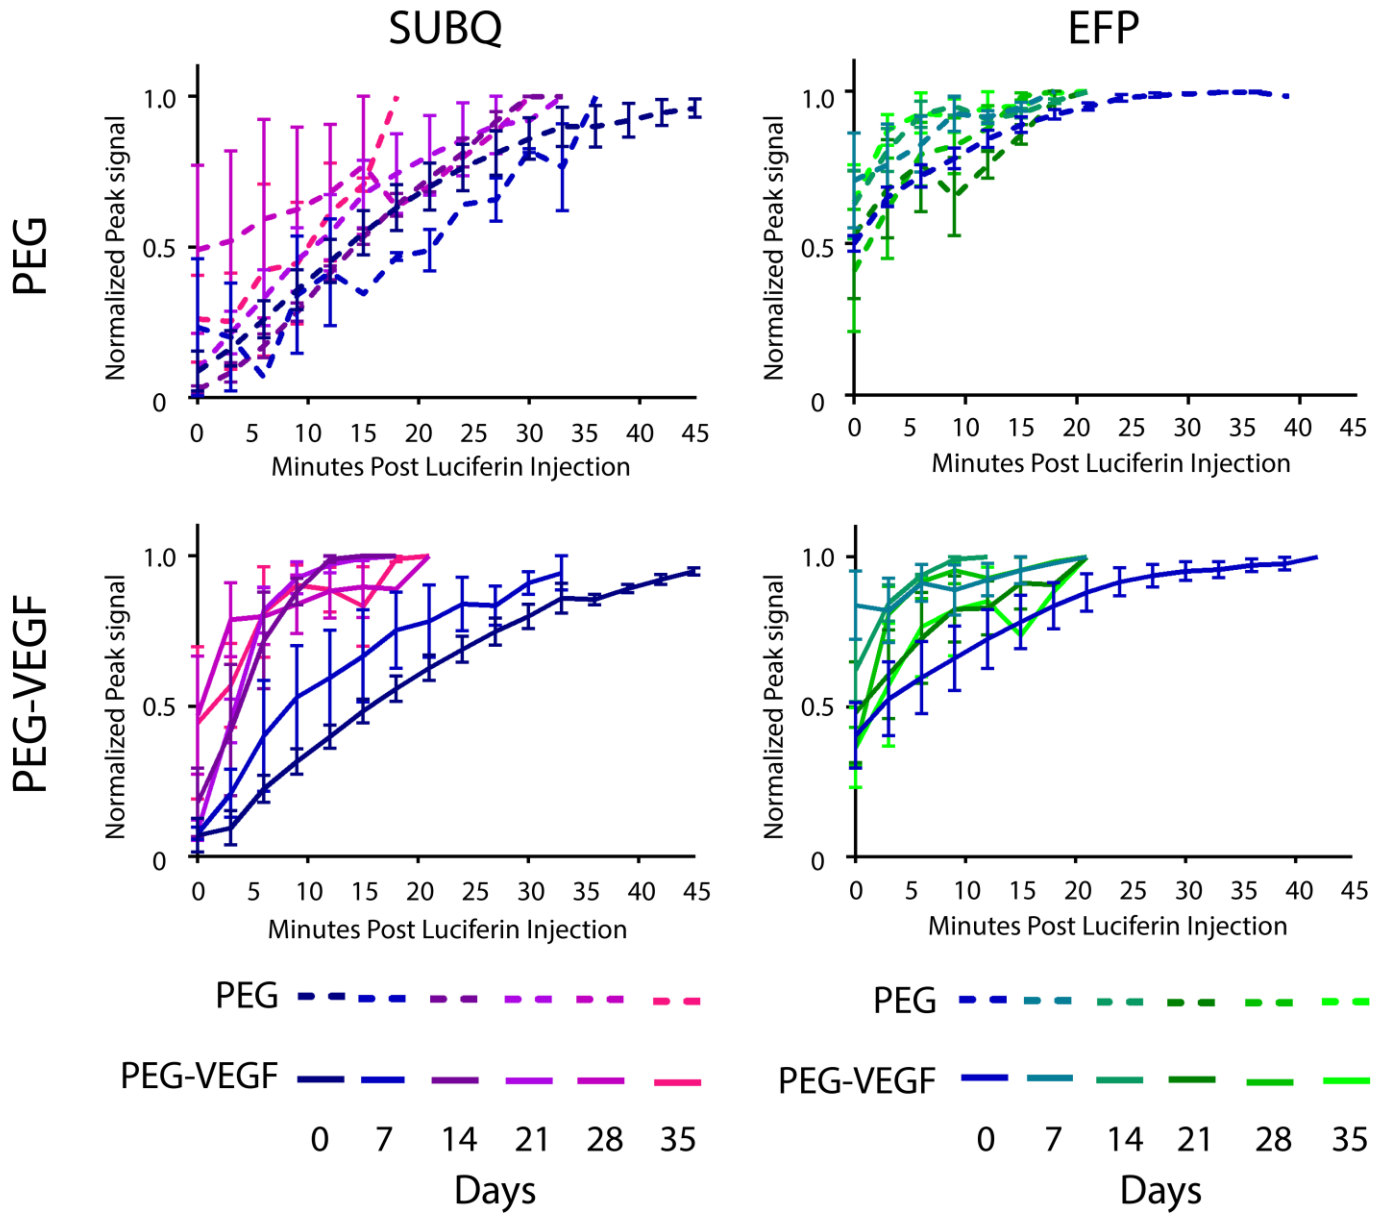

**fig. S10. Bioluminescence signal kinetics by time point.**
